# Supplementary material for: The gold-ringed octopus (Amphioctopus fangsiao) genome and cerebral single-nucleus transcriptomes provide insights into the evolution of karyotype and neural novelties
Source: Springer Nature journal article supplement (doi:10.1186/s12915-022-01500-2), 2022-12-27

**Fig. s1** | The genetic linkage map of Hi-C data. LG 01–30 are the abbreviations of Lachesis Group 01-30, and correspond to 30 pseudo-chromosomes. The blocks represent the contact between one location and the other locations. The color bar illuminates the contact density from orange (low) to red (high).

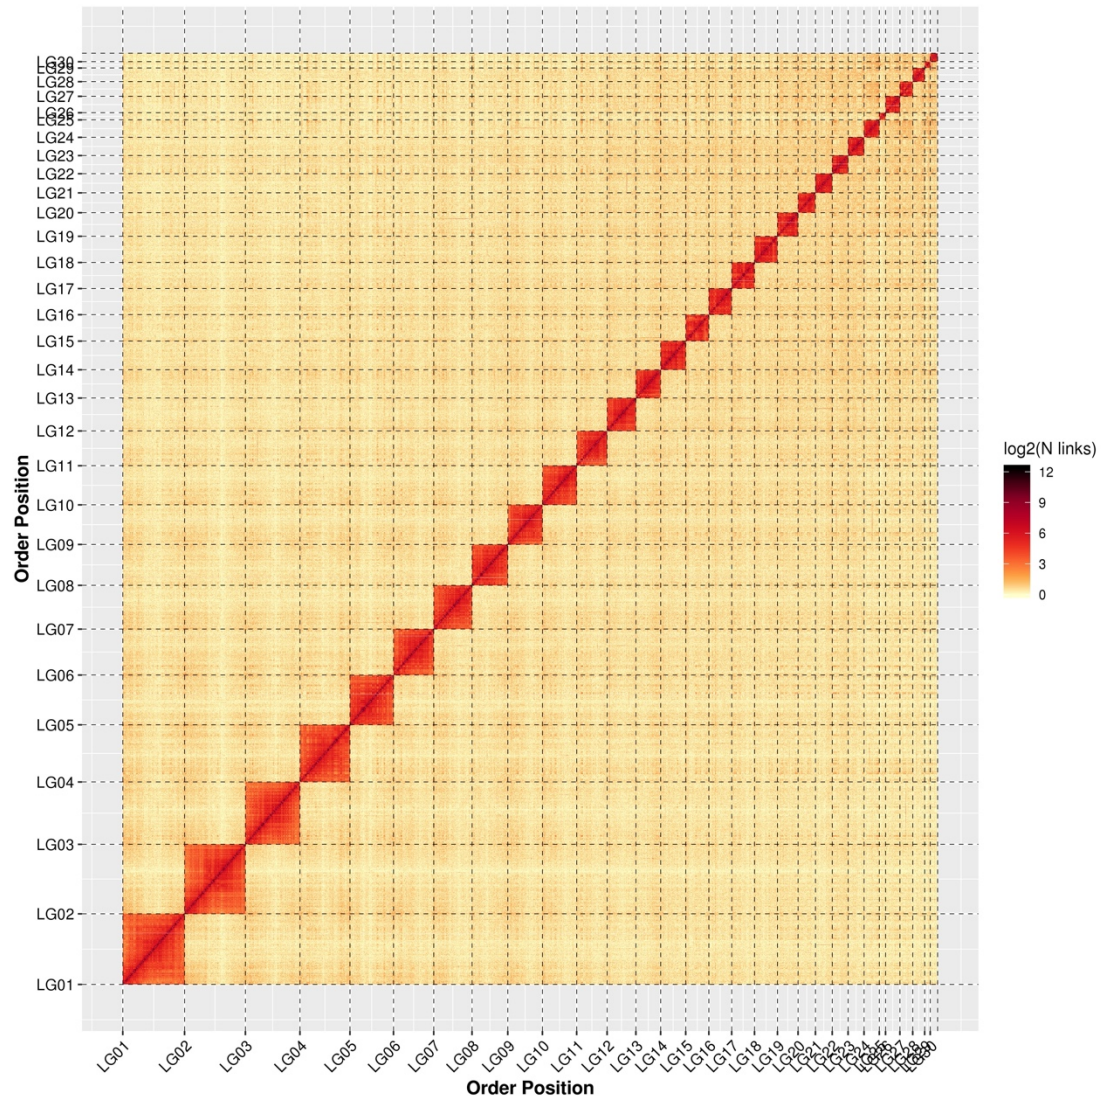

a

Phylogenetic tree (a) showing relationships between various mollusk species. The tree is rooted on the left and branches to the right. Bootstrap values are indicated at the nodes. The species names are listed on the right, with some in bold. A scale bar of 0.2 is at the bottom.

Species listed (from top to bottom):

- Ampafoctopus fangsiao*
- Hapalochlaena maculosa*
- Octopus bimaculoides*
- Octopus vulgaris*
- Architeuthis dux*
- Euprymna scolopes*
- Nautilus pompilius*
- Argopecten purpuratus*
- Pecten maximus*
- Mizuhopecten yessoensis*
- Anadara broughtonii*
- Crassostrea gigas*
- Saccostrea glomerata*
- Mytilus unguiculatus*
- Lutaria rhynchaena*
- Bathycyma lactea*
- Lottia gigantea*
- Chrysomallon squamiferum*
- Lanistes nyassanus*
- Marisa cornuarietis*
- Pomacea canaliculata*
- Biomphalaria glabrata*
- Aplysia californica*
- Elysia chlorotica*
- Acanthopleura granulata*
- Phoronis australis*
- Capitella teleta*
- Helobdella robusta*

Scale bar: 0.2

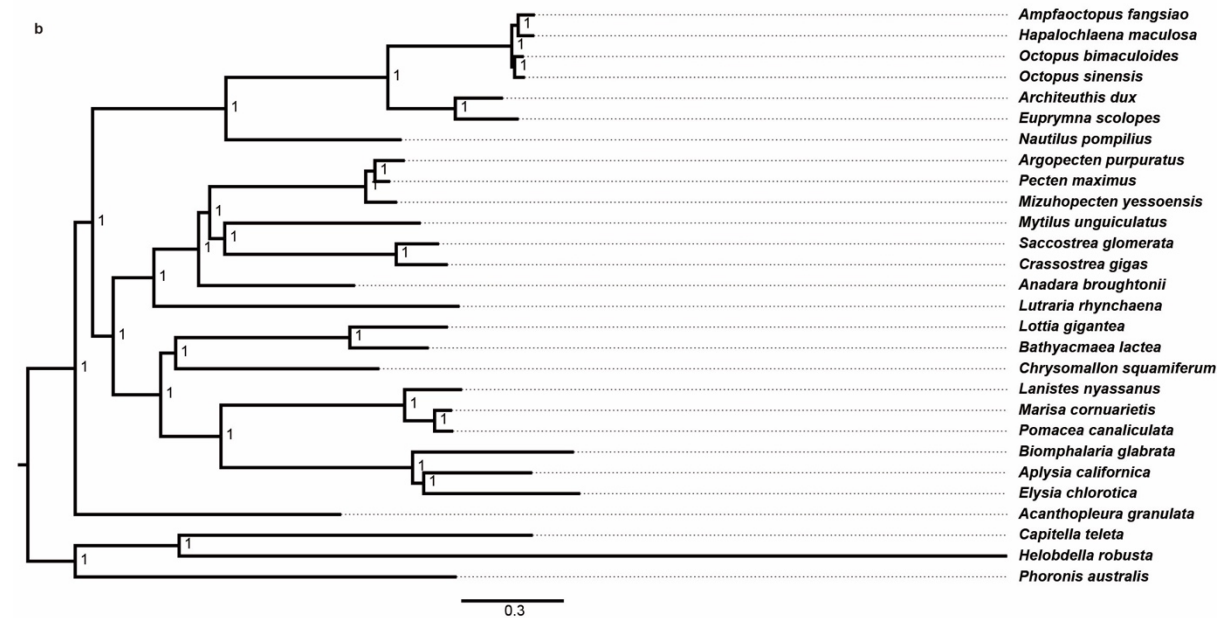

**Fig. s3** | Heat map of homologous genes in pairwise chromosomes of *A. fangsiiao* (ampfa) and *O. sinensis* (octsi). Each block represents the number of homologous genes.

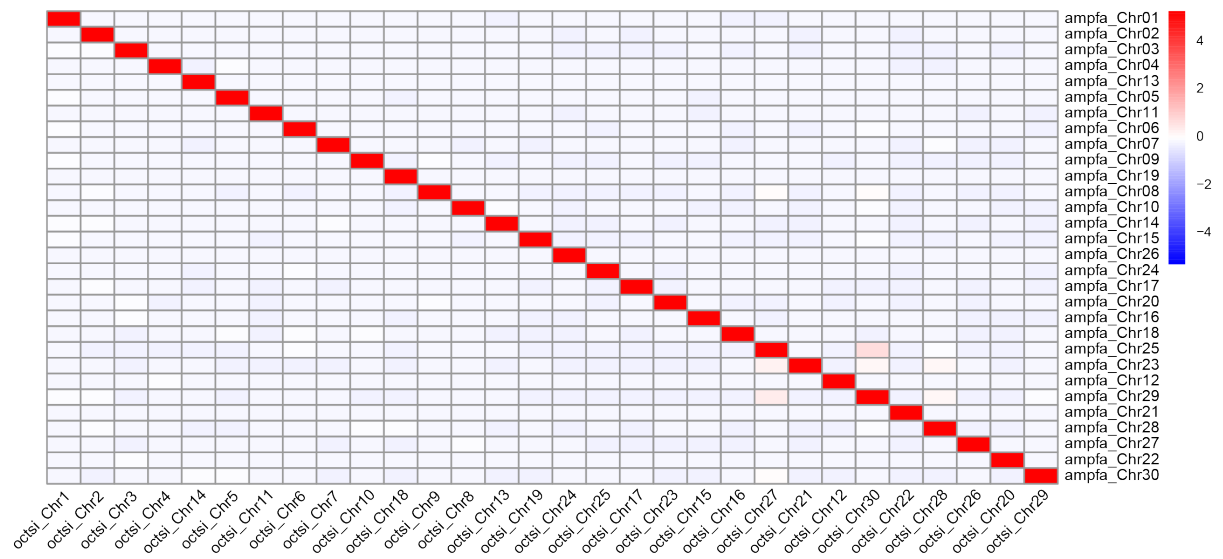

**Fig. s4** | Heat map of homologous genes in pairwise chromosomes of *A. fangsiiao* (ampfa\_) and *N. pompilius* (naupo\_). Each block represents the number of homologous genes.

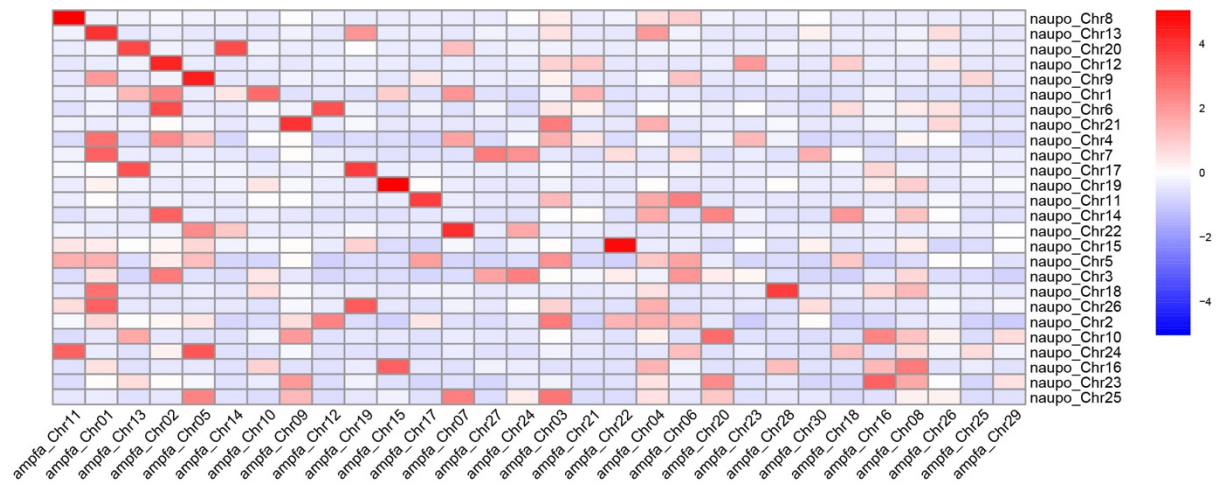



**Fig. s5** | Heat map of homologous genes in pairwise chromosomes of *O. sinensis* (octsi\_) and *N. pompilius* (naupo\_). Each block represents the number of homologous genes.

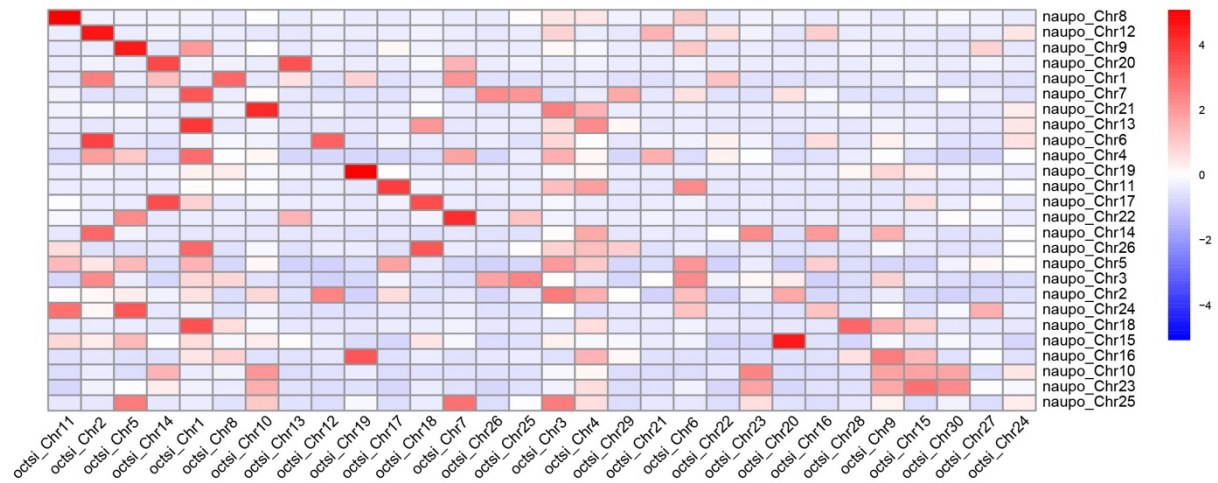

**Fig. s6** | Synteny blocks between *A. fangsiao* and *O. sinensis*. **a)** Chromosome synteny analyses among 30 chromosomes of *A. fangsiao* (ampfa) and *O. sinensis* (octsi). **b)** Chromosome synteny analyses between *A. fangsiao* (af\_), *O. sinensis* (os\_) and *N. pompilius* (np\_).

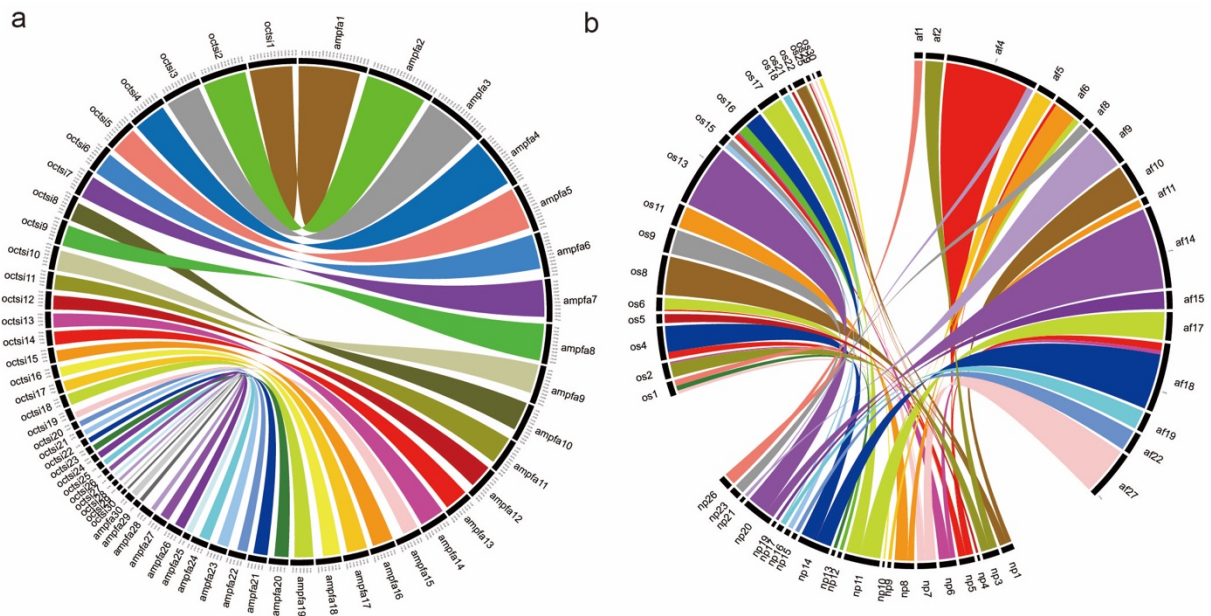

**Fig. s7 | (a)** An overall view of the genomic organization of protocadherin (PCDH), GPCR and C2H2 ZNF in *A. fangsiao* (left) and *O. sinensis* (right). The chromosome relationships are derived from Fig. s6, and are linked by orange arrow at middle. The black arrows at sides point out the chromosomes that contain gene clusters. C2H2 ZNF clusters in the chromosomes of *A. fangsiao* (b) and *O. sinensis* (c).

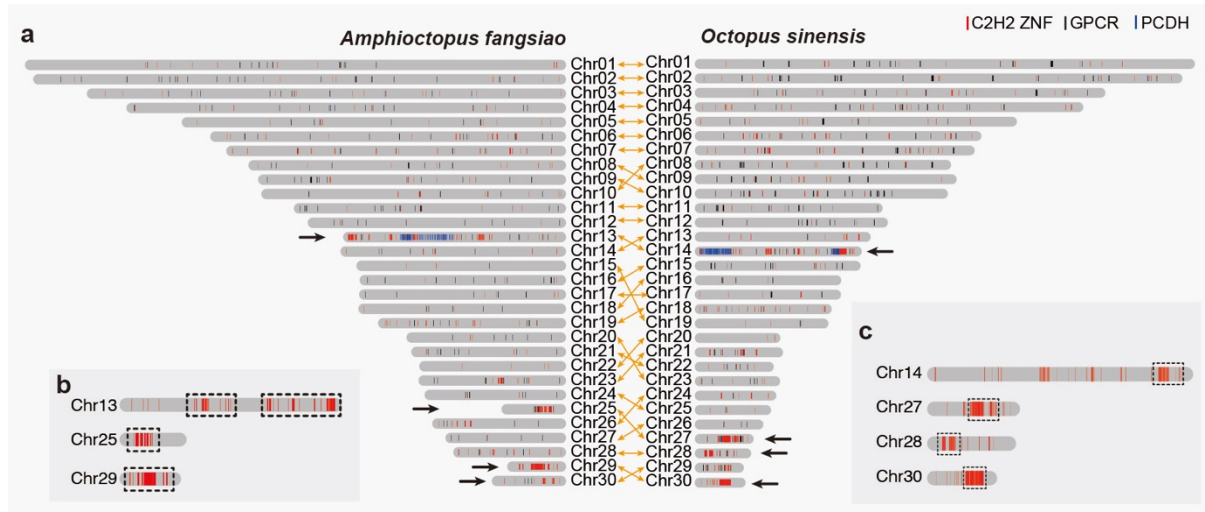

**Fig. s8** | Divergent time of C2H2 zinc finger transcription factor (C2H2 ZNF) in *A. fangsiao* (ampfa, top), *O. sinensis* (octsi, middle) and *O. bimaculoides* (octbi, bottom).

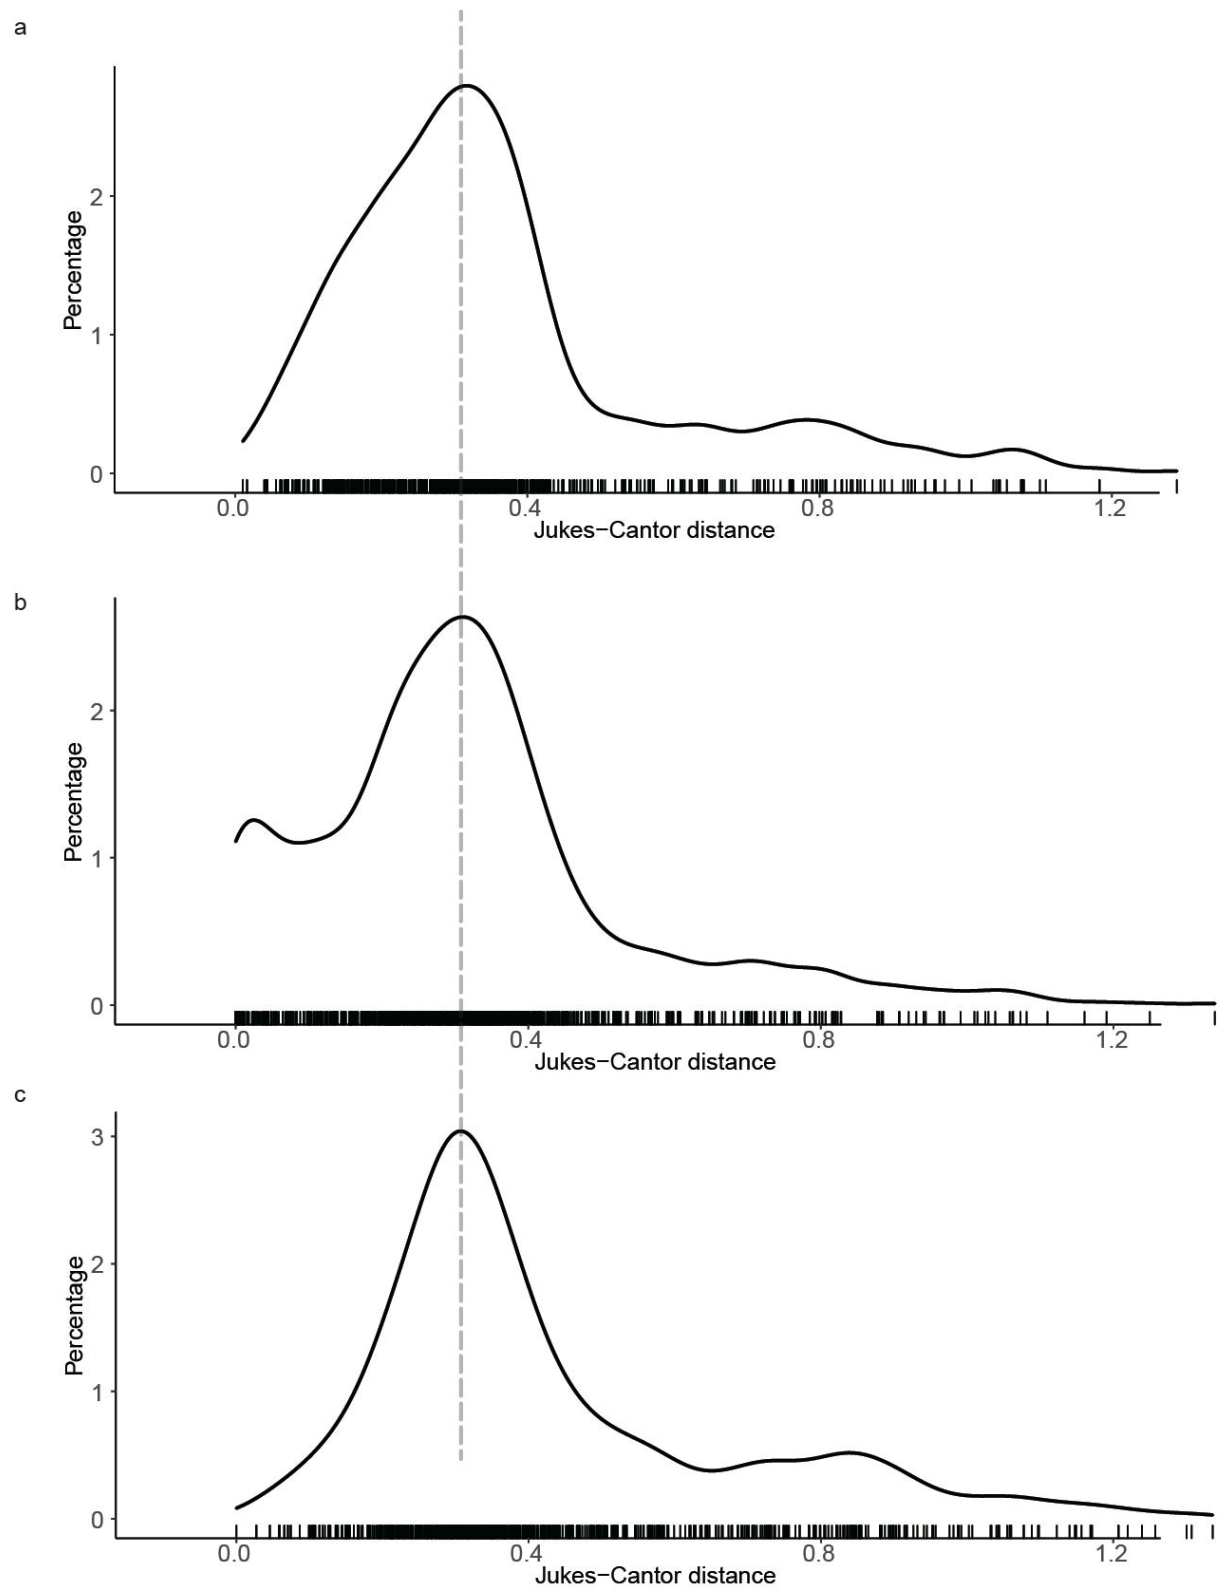

**Fig. s9** | Cell population composition of the **supra-esophageal brain of *A. fangsiao***. **a**, Comparison of Uniform Manifold Approximation and Projection (UMAP) representation of transcriptomes derived from 10x Genomics (right) and DNBelab C4 (left) platforms (Supplementary data 2). **b**, Percentage of cells that derived from two sequencing platforms in each cluster (Table s9). **c**, Uniform Manifold Approximation and Projection (UMAP) representation of transcriptomes derived from the integration of 10x Genomics and DNBelab C4 platforms.

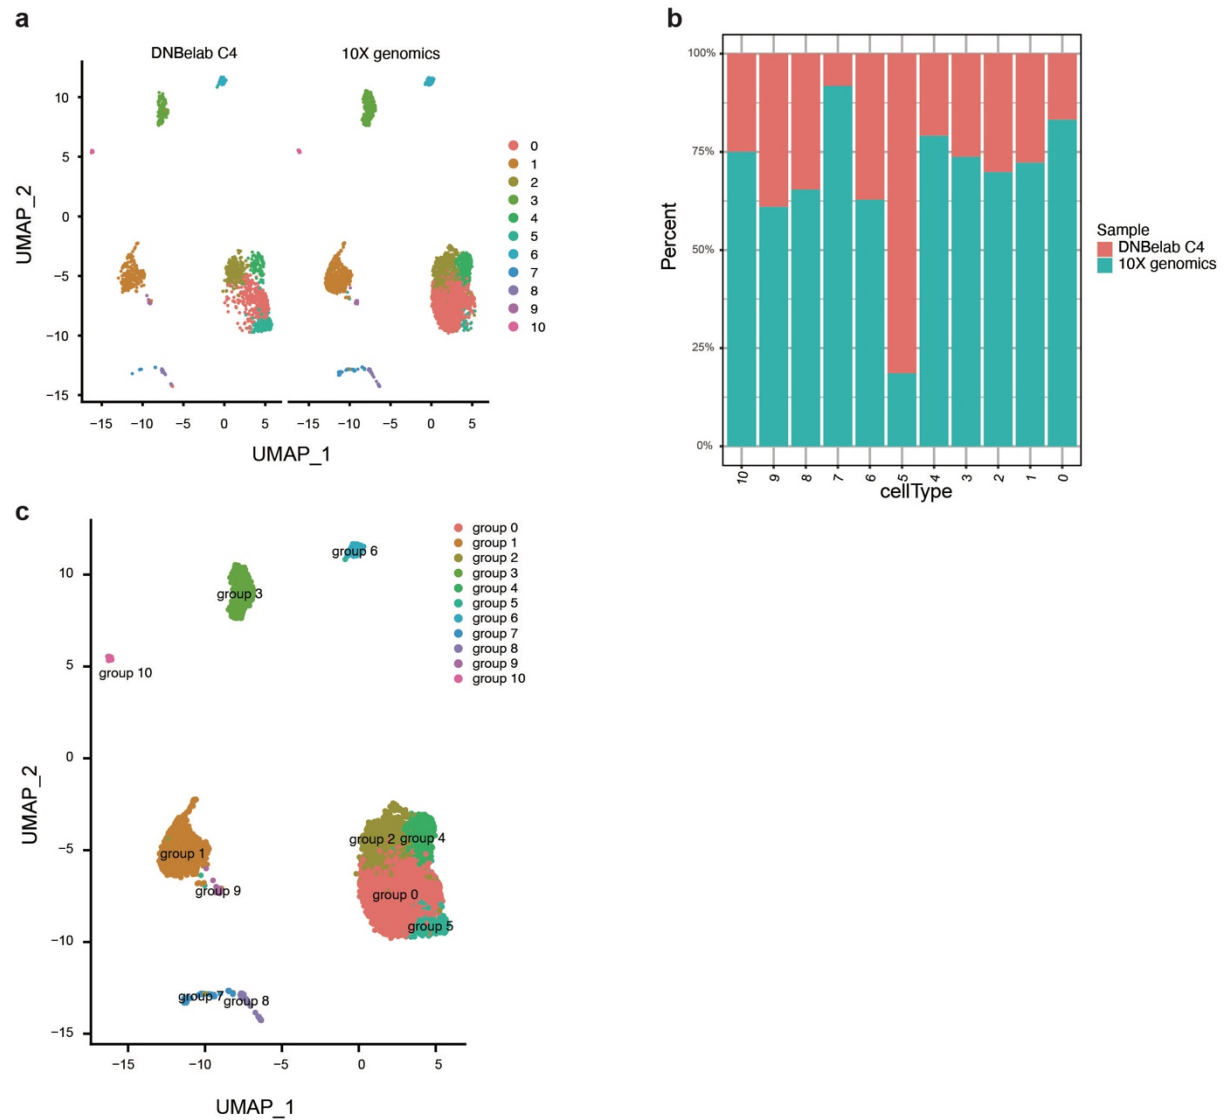

**Fig. s10** | Expression of top 10 marker genes of cell type 1-8.

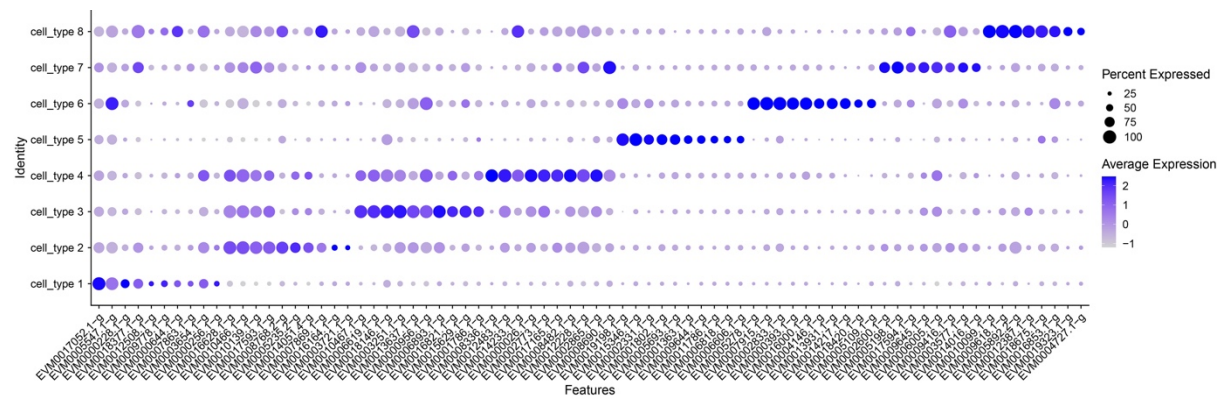



**Fig. s11** | Comparisons of functions in cell type 2-8.

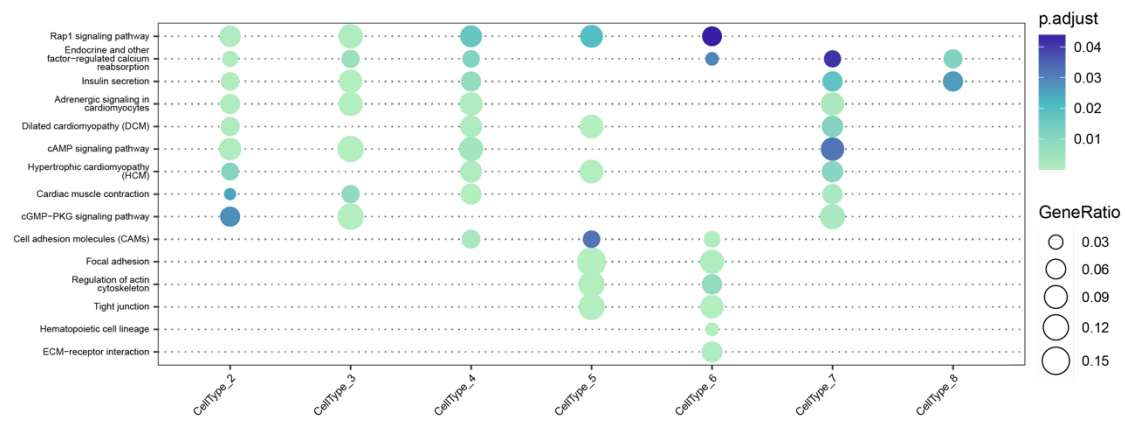

**Fig. s12** | Bulk transcriptomic expression of 10 marker genes of cell type 1-8.

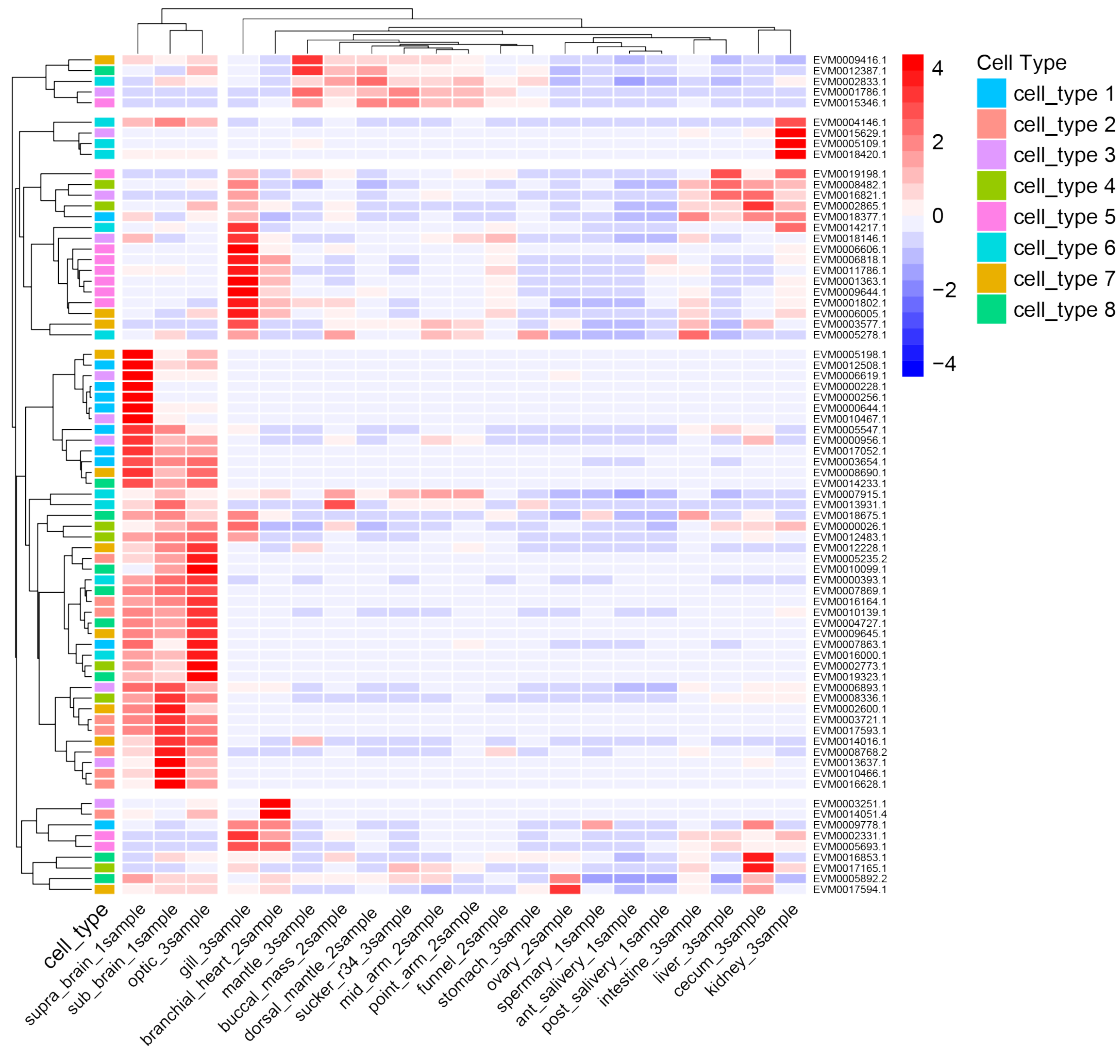

**Fig. 13** | Bar plot reflected the number of C2H2 ZNF (top), protocadherin (middle), and GPCR (bottom) genes in marker genes of cell type 1-8.

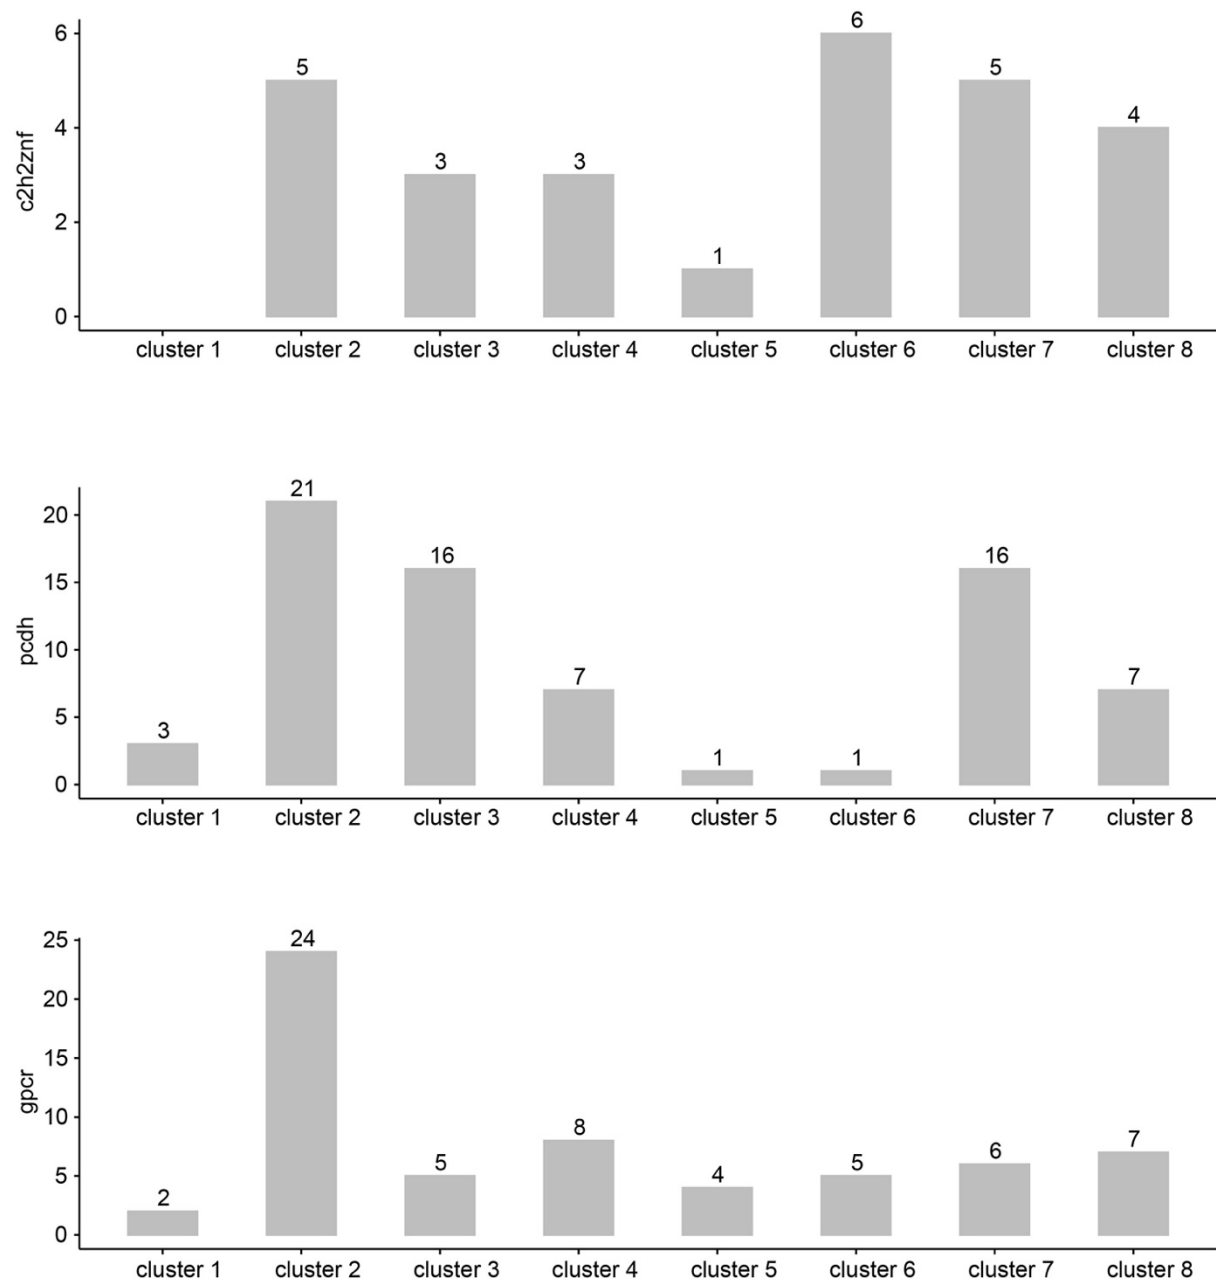

**Fig. 14** | Heatmap of GPCR, C2H2 ZNF, and protocadherin (x axis) expressions in the sup-brain cell types (x axis). The GPCR, C2H2 ZNF, and protocadherin genes were the marker genes in each cell type.

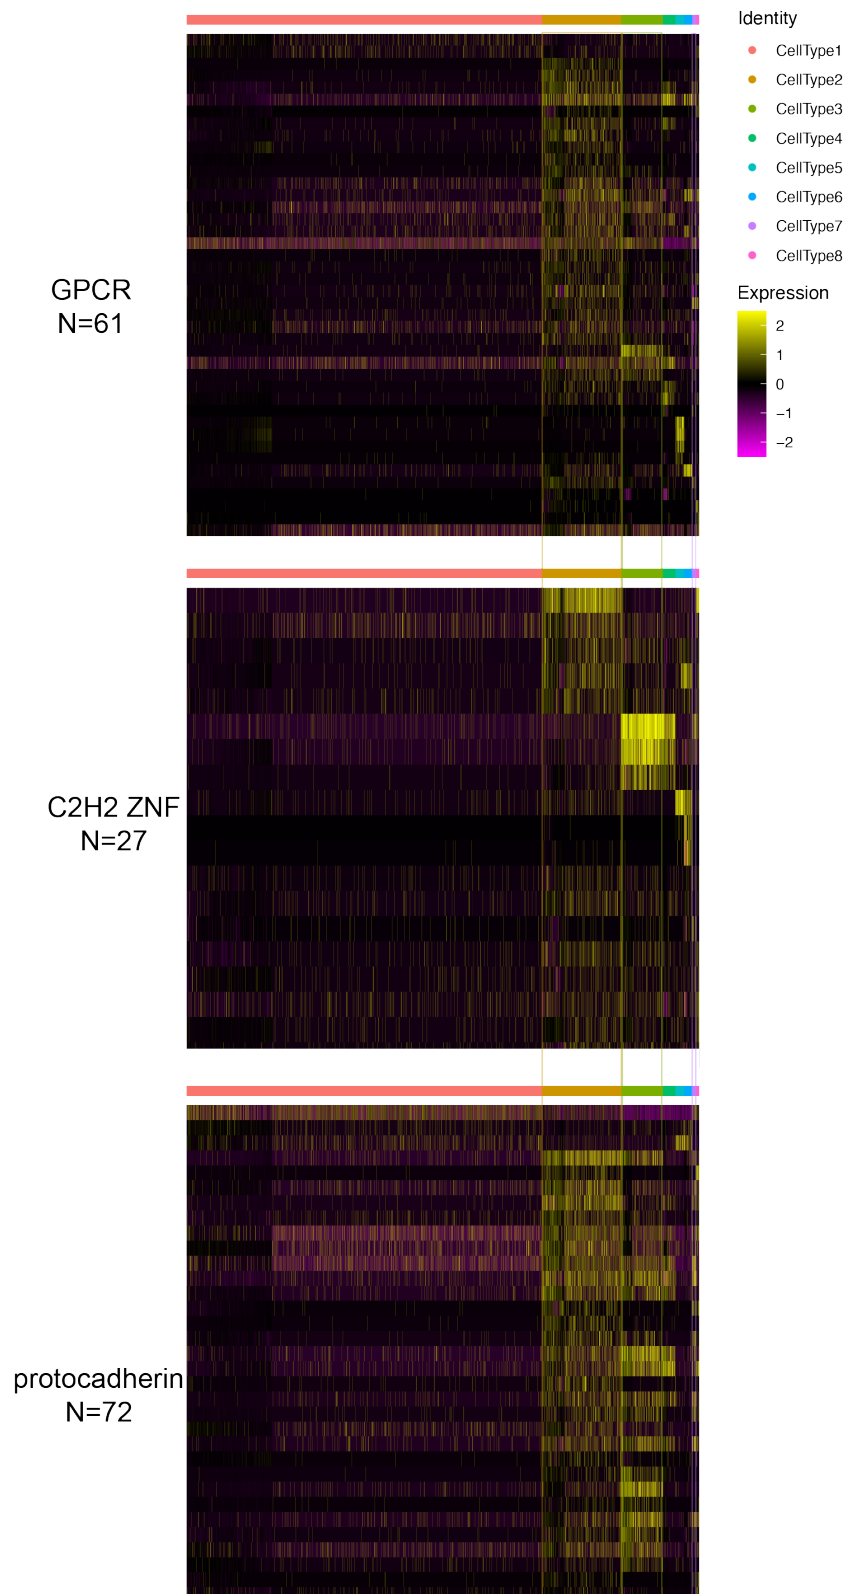

**Fig. 15** | Boxplot of average expression of protocadherin (a), GPCR (b), and C2H2 ZNF (c) in cells. The plot was divided by cell types (x axis), and each dot represented the average expression of a protocadherin (GPCR, or C2H2 ZNF) gene in a cell. Paired comparisons between cell type 2 and other cell types were analyzed by a Wilcoxon rank sum test on R v4.0.3 platform, and the  $p$  values were listed above each box.

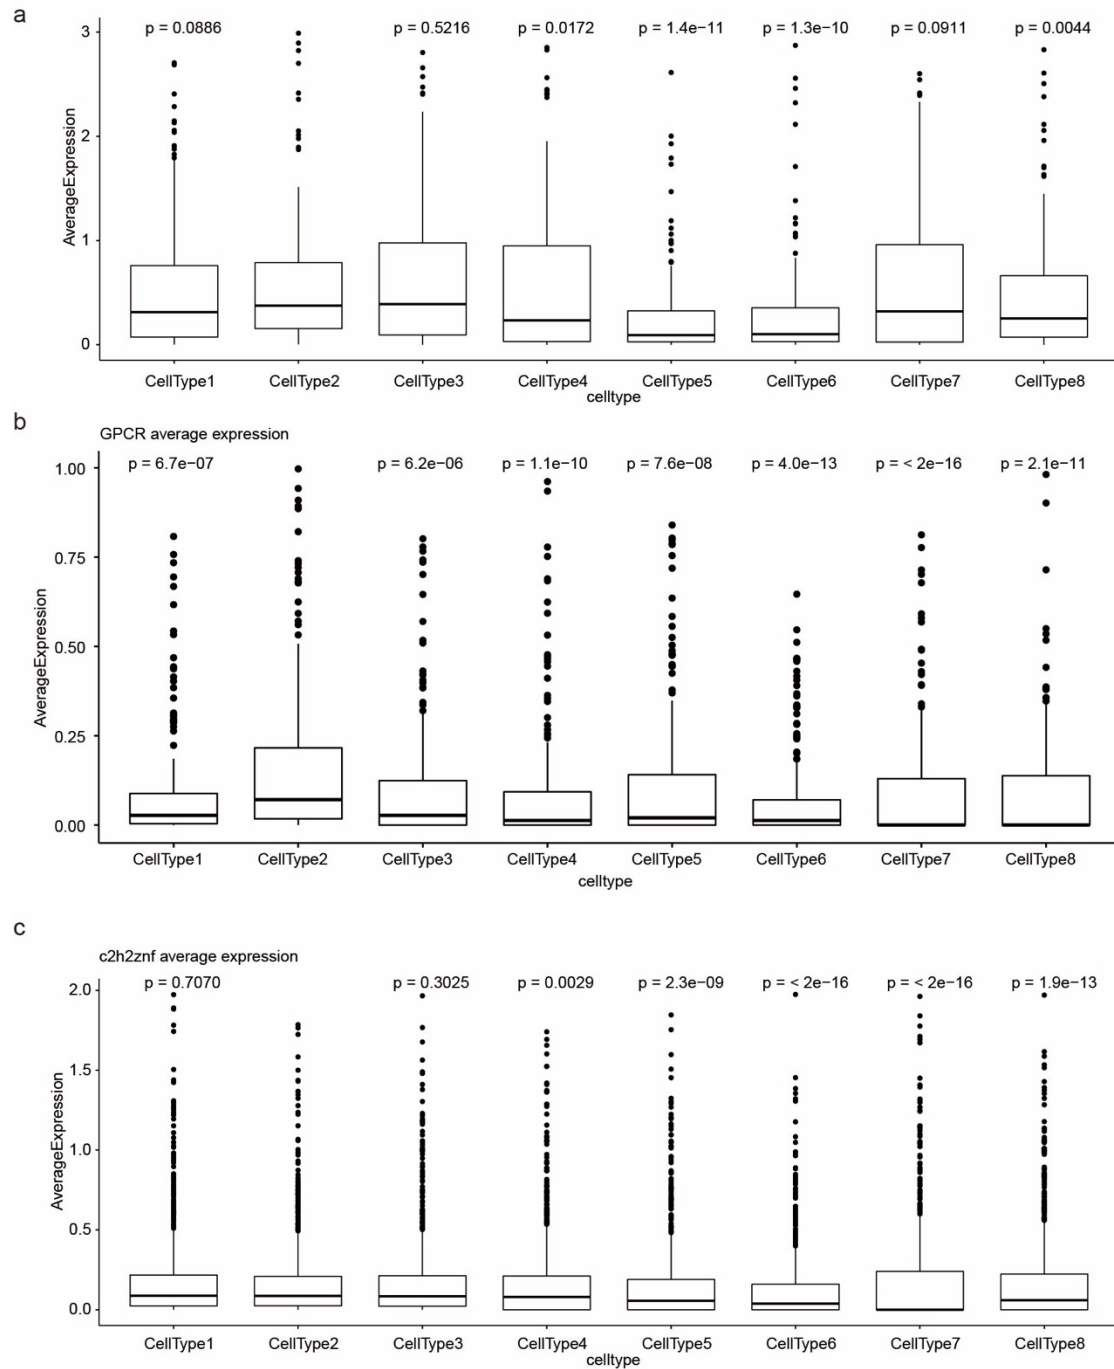

Supplement: MOESM2 [file 12915_2022_1500_MOESM2_ESM.pdf]
